# Supplementary material
Source: ML conference proceedings conference paper supplement (https://aclanthology.org/D19-6401)
Supplement: Attachment [file D19-6401.Attachment.zip]

## A Appendix

```

procedure RUN-MODULE( $m, A, p, \mathbf{c}_t, \mathcal{I}$ )
   $a_1 \leftarrow \sum_{i=1}^L A_i \cdot p_i$     // Read from stack
   $p \leftarrow \text{1D-conv}(p, [0, 0, 1])$     // decrement the stack pointer
  if no. of inputs == 4 then
     $a_2 \leftarrow \sum_{i=1}^L A_i \cdot p_i$     // Read from stack
     $p \leftarrow \text{1D-conv}(p, [0, 0, 1])$     // decrement the stack pointer
     $o_m \leftarrow m(\mathcal{I}, \mathbf{c}_t, a_1, a_2)$ 
    end
  else
     $o_m \leftarrow m(\mathcal{I}, \mathbf{c}_t, a_1)$ 
    end
   $p \leftarrow \text{1D-conv}(p, [1, 0, 0])$     // increment the stack pointer
  for  $i = 1, \dots, L$  do
     $A \leftarrow A \cdot (1 - p_i) + o_m \cdot p_i$     // Write to stack
  end
  return  $A, p$ 

```

**Algorithm 3:** Operation of a module

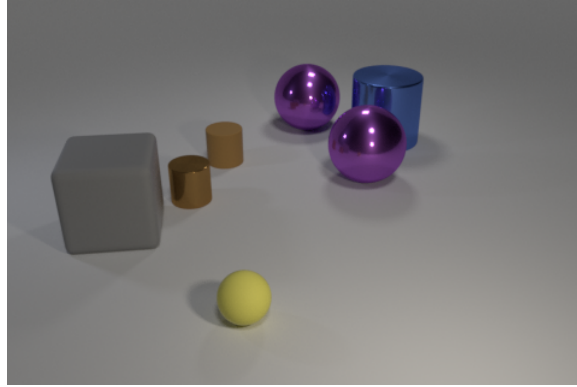

Figure 4: **Q1:** What number of cylinders are gray objects or tiny brown matte objects? **A:** 1

**Q2:** Is the number of brown cylinders in front of the brown matte cylinder less than the number of brown rubber cylinders? **A:** no

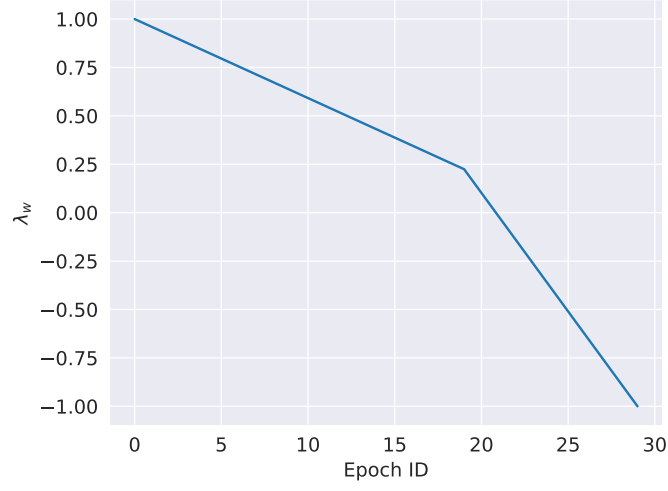

Figure 5: Plot of variation of  $\lambda_w$  with epochs.

### A.1 Module schematic diagrams

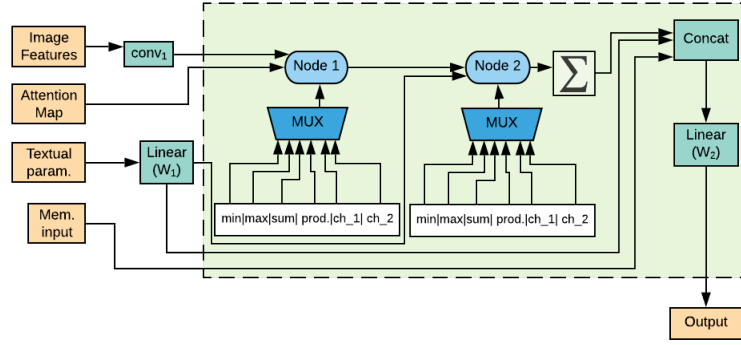

Figure 6: Answer Module schematic diagram (3 inputs)

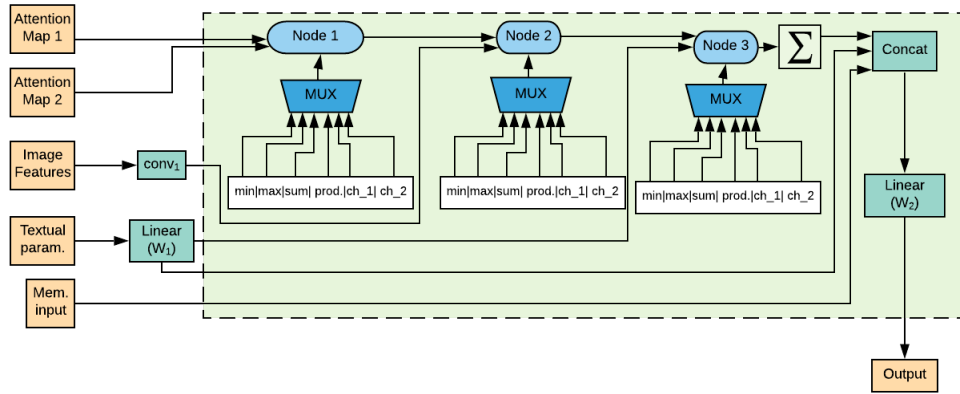

Figure 7: Answer Module schematic diagram (4 inputs)

### A.2 Hand-crafted modules of Stack-NMN

| module name | input attention | output type | implementation details<br>( $x$ : image feature map, $c$ : textual parameter)     |
|-------------|-----------------|-------------|-----------------------------------------------------------------------------------|
| Find        | (none)          | attention   | $a_{out} = \text{conv}_2(\text{conv}_1(x) \odot Wc)$                              |
| Transform   | $a$             | attention   | $a_{out} = \text{conv}_2(\text{conv}_1(x) \odot W_1 \sum(a \odot x) \odot W_2 c)$ |
| And         | $a_1, a_2$      | attention   | $a_{out} = \text{minimum}(a_1, a_2)$                                              |
| Or          | $a_1, a_2$      | attention   | $a_{out} = \text{maximum}(a_1, a_2)$                                              |
| Filter      | $a$             | attention   | $a_{out} = \text{And}(a, \text{Find}())$ , i.e. reusing Find and And              |
| Scene       | (none)          | attention   | $a_{out} = \text{conv}_1(x)$                                                      |
| Answer      | $a$             | answer      | $y = W_1^T (W_2 \sum(a \odot x) \odot W_3 c)$                                     |
| Compare     | $a_1, a_2$      | answer      | $y = W_1^T (W_2 \sum(a_1 \odot x) \odot W_3 \sum(a_2 \odot x) \odot W_4 c)$       |
| NoOp        | (none)          | (none)      | (does nothing)                                                                    |

Table 8: Neural modules used in (Hu et al., 2018). The modules take image attention maps as inputs, and output either a new image attention  $a_{out}$  or a score vector  $y$  over all possible answers ( $\odot$  is elementwise multiplication;  $\sum$  is sum over spatial dimensions).

### A.3 Visualization of module structure parameters

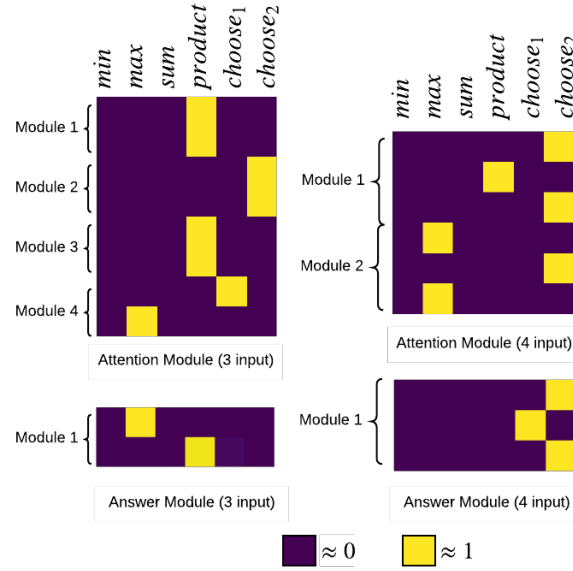

Figure 8: Visualization of module structure parameters (LNMN (9 modules)). For each module, each row denotes the  $\alpha' = \sigma(\alpha)$  parameters of the corresponding node.

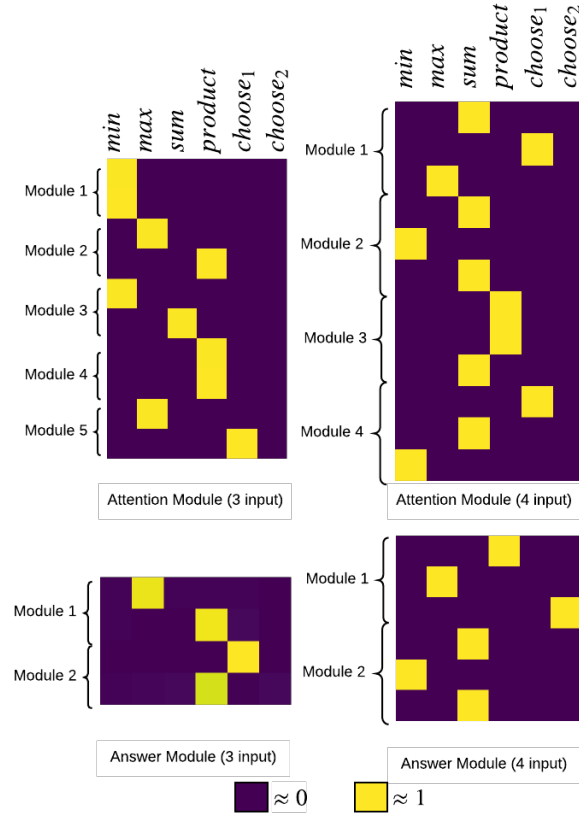

Figure 9: Visualization of module structure parameters (LNMN (14 modules)). For each module, each row denotes the  $\alpha' = \sigma(\alpha)$  parameters of the corresponding node.

#### A.4 Results on Natural Image VQA datasets

| Model            | Overall | Yes/No | Number | Other |
|------------------|---------|--------|--------|-------|
| Stack-NMN        | 59.84   | 80.75  | 37.49  | 46.83 |
| LNMN (9 modules) | 57.67   | 80.41  | 36.65  | 42.82 |

Table 9: Test Accuracy on VQA v1 (Antol et al., 2015)

| Model            | Overall | Yes/No | Number | Other |
|------------------|---------|--------|--------|-------|
| Stack-NMN        | 58.23   | 77.06  | 37.48  | 46.59 |
| LNMN (9 modules) | 54.85   | 73.78  | 35.05  | 42.92 |

Table 10: Test Accuracy on VQA v2 (Goyal et al., 2017)
